# Supplementary material for: Cyp26 Enzymes Facilitate Second Heart Field Progenitor Addition and Maintenance of Ventricular Integrity
Source: PLoS Biol. 2016 Nov 28;14(11):e2000504. doi: 10.1371/journal.pbio.2000504 (PMC5125711; doi:10.1371/journal.pbio.2000504)
Supplement: S2 Data — Excel spreadsheet containing in separate sheets all the numerical data and statistical analysis for the Figure panels S2Q, S2R, S2S, S2T, S3C, S3F, S3K, S3L, S7E, S7F, S8A, S8B, S8C, S9C, S9F, S10E, and S10F. (XLSX) [file pbio.2000504.s012.xlsx]

## Sheet: S2Q Fig
Ventricular cardiomyocyte counts
48hpf									72hpf
	control		cyp26c1 deficient		gir		gir+c1			control		cyp26c1		gir		gir+c1
	70		61		43		41			82		68		57		32
	74		67		52		29			80		84		56		31
	53		67		45		33			92		87		63		63
	69		77		58		36			101		89		80		19
	56		57		58		34			82		90		78		37
	75		62		47		57			68		103		68		35
	59		62		25		58			92		85		58		42
	73		63		41		22
	69		96		41		40
	61		80		46		35
Average	65.9		69.2		45.6		38.5		Average	85.2857		86.5714		65.7143		37
STD	7.9645		11.8491		9.57079		11.3652		STD	10.6882		10.3418		9.97855		13.4784
SEM	2.5186		3.747		3.02655		3.59398		SEM	4.03977		3.90882		3.77154		5.09435
	t-test at 48 hpf									t-test at 72 hpf
	control vs gir									control vs gir
	7.33784e-05									0.0040895
	control vs gir+c1									control vs gir+c1
	1.13406e-05									1.06868e-05
	gir vs gir+c1									gir vs gir+c1
	0.148618									0.000846425

## Sheet: S2R Fig
Atrial cardiomyocyte counts 48 hpf
	control		cyp26c1 MO		gir		gir+c1
	68		41		48		56
	48		44		47		36
	48		48		44		45
	54		51		29		73
	51		46		50		59
	35		61		40		55
	40		41		57		54
	45		42				41
	53		41
			45
Average	49.1111		46		45		52.375
STD	9.36008		6.2361		8.79394		11.612
SEM	3.12003		1.97203		3.3238		4.10547
	t-test at 48 hpf
	control vs gir
	0.383061
	control vs gir+c1
	0.537343
	gir vs gir+c1
	0.186444

## Sheet: S2S Fig
Cyp26 deficient atrial cardiomyocyte counts 48 hpf
	control		Cyp26 deficient
	70		69
	91		52
	50		87
	64		83
	84		61
	84		59
	90		79
	65		78
	71		99
	63		87
	54		57
	66		72
	75		75
	123		90
Average	75		74.8571
STD	18.6052		13.9442
SEM	4.97245		3.72673
	t-test
	0.981848

## Sheet: S2T Fig
Kaede OFT addition
	Control	cyp26c1 MO	gir	gir+c1
	3661	7010	3471	2079
	4516	8354	2027	4890
	7940	5794	3793	1411
	7153	5537	2847	4389
	6413	5625	5365	2218
	5037	5424	5791	3141
		6263	4891	2128
		7238		2175
		4138		4896
		7268		2683
Average	5786.67	6265.1	4026.43	3001
STD	1648.7	1214.02	1378.69	1275.51
SEM	673.079	383.906	521.096	403.351
	t-test control vs gir+c1
	0.00665977
	t-test control vs gir
	0.0659553
	t-test cyp26c1 MO vs gir
	0.00476286
	t-test cyp26c1 vs gir+c1
	1.51233e-05
	t-test gir vs gir+c1
	0.144861

## Sheet: S3C Fig
Keto treatment cardiomyocyte counts at 48hpf
		DMSO 48		Keto Cell Counts
		ventricle		Ventricle
		77		42
		72		37
		59		34
		75		47
		77		47
		83		55
		76		51
				32
				50
				49
	Average	74.1429		44.4
	STD	7.44823		7.77746
	SEM	2.81517		2.45945
			t-test
			1.91323e-06

## Sheet: S3F Fig
RA treated ventricular counts
	DMSO - 48hpf	2uM RA - 48hpf		DMSO - 72 hpf	2uM RA - 72 hpf
	61	26		72	32
	104	33		83	31
	74	52		45	30
	69	59		49	34
	104	51		108	28
	100	61		101	18
	101	55		91	31
	98	45		82
	89	52		83
	76	37		73
Average	87.6	47.1		78.7	29.1429
STD	16.1741	11.5993		20.1387	5.24177
SEM	5.11468	3.66803		6.36841	1.9812
	t-test 48 hpf			t-test 72 hpf
	7.49995e-06			1.54999e-05

## Sheet: S3K Fig
DEAB treated ventricular counts
	Control	DEAB	Cyp26 deficient	Cyp26 deficient + DEAB
	87	80	43	94
	55	113	18	92
	74	87	68	119
	91	89	64	68
	61	111	65	86
	66	77	50	106
	71	133	58	105
	84	86	36	98
	75	93	39	71
	94	105	42	92
Average	75.8	97.4	48.3	93.1
STD	13.0367	17.6396	15.7554	15.5453
SEM	4.12257	5.57813	4.9823	4.91585
	t-test
	control vs DEAB
	0.006462
	control vs Cyp26 deficient
	0.000513127
	control vs Cyp26 deficient + DEAB
	0.0150307
	Cyp26 deficient vs Cyp26 deficient + DEAB
	5.01696e-06

## Sheet: S3L Fig
Cyp26a1 mRNA Ventricle counts
	Control	cyp26a1 mRNA	Cyp26 deficient	Cyp26 deficient + cyp26a1 mRNA
	71	65	63	80
	63	83	79	65
	79	74	29	82
	77	70	57	71
	65	91	79	77
	93	88	38	63
	87	90	67	94
		64	50	68
		64	47	81
		90	49	79
Average	76.4286	77.9	55.8	76
STD	11.0583	11.6567	16.4911	9.36898
SEM	4.17964	3.68616	5.21494	2.96273
	t-test
	control vs cyp26a1 mRNA
	0.795738
	control vs Cyp26 deficient
	0.00752202
	cyp26a1 mRNA vs Cyp26 deficient
	0.003172
	Cyp26 deficient vs Cyp26 deficient + cyp26a1 mRNA
	0.00449373

## Sheet: S5I Fig
RT-qPCR for mef2cb
				mef2cb control vs Cyp26 deficient 16s
				8.76
				8.35	8.5025
				8.66
				8.24
		mef2cb	b-actin	DCt	DDCt	2-DDCt	average	Dev. St.	Err. St.	ttest
	control	25.45	16.69	8.76	0.2575	0.836536	1.01104	0.172416	0.0862082	0.129121
		25.47	17.12	8.35	-0.1525	1.11149
		25.35	16.69	8.66	0.1575	0.896577
		25.36	17.12	8.24	-0.2625	1.19956
	Cyp26 deficient	24.49	16.24	8.25	-0.2525	1.19127	1.19687	0.0173228	0.00866142
		24.82	16.6	8.22	-0.2825	1.2163
		24.8	16.54	8.26	-0.2425	1.18304
				mef2cb control vs Cyp26 deficient 24hpf
				8.06
				8.17	8.0975
				8.22
				7.94
		mef2cb	b-actin	DCt	DDCt	2-DDCt	average	Dev. St.	Err. St.	ttest
	control	24.96	16.9	8.06	-0.0375	1.02633	1.00282	0.0875537	0.0437768	0.166062
		24.95	16.78	8.17	0.0725	0.950989
		25.07	16.85	8.22	0.1225	0.918594
		24.86	16.92	7.94	-0.1575	1.11535
	Cyp26 deficient	24.11	16.3	7.81	-0.2875	1.22052	1.10281	0.0918387	0.0459194
		24.27	16.35	7.92	-0.1775	1.13092
		24.28	16.22	8.06	-0.0375	1.02633
		24.35	16.3	8.05	-0.0475	1.03347
				mef2cb control vs Cyp26 deficient 36hpf
				9.13
				9.09	9.12333
				9.15
		mef2cb	b-actin	DCt	DDCt	2-DDCt	average	Dev. St.	Err. St.	ttest
	control	25.32	16.19	9.13	0.00666667	0.99539	1.00015	0.0212478	0.0106239	0.165778
		25.4	16.31	9.09	-0.0333333	1.02337
		25.35	16.2	9.15	0.0266667	0.981686
	Cyp26 deficient	25.79	16.86	8.93	-0.193333	1.1434	1.09865	0.101181	0.0505905
		25.99	16.79	9.2	0.0766667	0.948246
		25.94	17.04	8.9	-0.223333	1.16743
		26.05	17.11	8.94	-0.183333	1.1355
				mef2cb control vs Cyp26 deficient 48hpf
				9.43
				9.67	9.4825
				9.47
				9.36
		mef2cb	b-actin	DCt	DDCt	2-DDCt	average	Dev. St.	Err. St.	ttest
	control	25.63	16.2	9.43	-0.0525	1.03706	1.00313	0.0896601	0.04483	0.482161
		25.77	16.1	9.67	0.1875	0.878126
		25.68	16.21	9.47	-0.0125	1.0087
		25.63	16.27	9.36	-0.1225	1.08862
	Cyp26 deficient	25.37	16.02	9.35	-0.1325	1.09619	1.0584	0.117215	0.0586073
		25.61	15.98	9.63	0.1475	0.902814
		25.43	16.02	9.41	-0.0725	1.05154
		25.38	16.14	9.24	-0.2425	1.18304

## Sheet: S5J Fig
RT-qPCR for ltbp3
				ltbp3 control vs Cyp26 deficient 16s
				10.78
				10.31	10.6
				10.89
				10.42
		ltbp3	b-actin	DCt	DDCt	2-DDCt	average	Dev. St.	Err. St.	ttest
	control	27.47	16.69	10.78	0.18	0.882703	1.01403	0.194386	0.0971929	0.123313
		27.43	17.12	10.31	-0.29	1.22264
		27.58	16.69	10.89	0.29	0.817902
		27.54	17.12	10.42	-0.18	1.13288
	Cyp26 deficient	26.61	16.24	10.37	-0.23	1.17283	1.25875	0.134882	0.0674412
		26.64	16.54	10.1	-0.5	1.41421
		26.51	16.16	10.35	-0.25	1.18921
				ltbp3 control vs Cyp26 deficient 24hpf
				11.07
				11.1	11.155
				11.27
				11.18
		ltbp3	b-actin	DCt	DDCt	2-DDCt	average	Dev. St.	Err. St.	ttest
	control	27.97	16.9	11.07	-0.085	1.06069	1.00144	0.0615093	0.0307546	0.000585476
		27.88	16.78	11.1	-0.055	1.03886
		28.12	16.85	11.27	0.115	0.923382
		28.1	16.92	11.18	0.025	0.982821
	Cyp26 deficient	26.88	16.3	10.58	-0.575	1.48968	1.42762	0.113735	0.0568675
		26.91	16.35	10.56	-0.595	1.51047
		27.04	16.22	10.82	-0.335	1.26138
		26.92	16.3	10.62	-0.535	1.44894
				ltbp3 control vs Cyp26 deficient 36hpf
				11.82
				11.52	11.7167
				11.81
		ltbp3	b-actin	DCt	DDCt	2-DDCt	average	Dev. St.	Err. St.	ttest
	control	28.01	16.19	11.82	0.103333	0.93088	1.00476	0.122401	0.0612004	0.00325086
		27.83	16.31	11.52	-0.196667	1.14605
		28.01	16.2	11.81	0.0933333	0.937354
	Cyp26 deficient	27.97	16.86	11.11	-0.606667	1.52274	1.52453	0.133127	0.0665634
		28.07	16.79	11.28	-0.436667	1.35347
		28.01	17.04	10.97	-0.746667	1.67791
		28.2	17.11	11.09	-0.626667	1.54399
				ltbp3 control vs Cyp26 deficient 48hpf
				11.88
				12.05	11.84
				11.93
				11.5
		ltbp3	b-actin	DCt	DDCt	2-DDCt	average	Dev. St.	Err. St.	ttest
	control	28.08	16.2	11.88	0.04	0.972655	1.01062	0.176003	0.0880014	0.0484781
		28.15	16.1	12.05	0.21	0.864537
		28.14	16.21	11.93	0.09	0.939523
		27.77	16.27	11.5	-0.34	1.26576
	Cyp26 deficient	27.49	16.02	11.47	-0.37	1.29235	1.30628	0.162326	0.0811628
		27.6	15.98	11.62	-0.22	1.16473
		27.56	16.02	11.54	-0.3	1.23114
		27.36	16.14	11.22	-0.62	1.53688

[truncated: 14 more sheets: S5K Fig, S5L Fig, S5M Fig, S5N Fig, S7E Fig, S7F Fig, S8A Fig, S8B Fig, S8C Fig, S9C Fig, S9F Fig, S9I Fig, S10E Fig, S10F Fig]
